# Supplementary material for: Highly efficient hydrogenation of levulinic acid into 2-methyltetrahydrofuran over Ni–Cu/Al2O3–ZrO2bifunctional catalysts
Source: Royal Society of Chemistry journal article supplement (doi:10.1039/c8gc02914h), 2019-01-01

## Supporting Information

### Highly efficient hydrogenation of levulinic acid to 2-methyltetrahydrofuran over Ni-Cu/Al<sub>2</sub>O<sub>3</sub>-ZrO<sub>2</sub> bifunctional catalysts

Zhenbing Xie,<sup>a,b</sup> Bingfeng Chen,<sup>a\*</sup> Haoran Wu,<sup>a,b</sup> Mingyang Liu,<sup>a,b</sup> Huizhen Liu,<sup>a,b</sup> Jianling Zhang,<sup>a,b</sup> Guanying Yang,<sup>a</sup> and Buxing Han<sup>a,b\*</sup>

a. Beijing National Laboratory for Molecular Sciences, CAS Key Laboratory of Colloid and Interface and Thermodynamics, Institute of Chemistry, Chinese Academy of Sciences, Beijing, 100190, P. R. China. E-mail: hanbx@iccas.ac.cn;

b. School of Chemistry and Chemical Engineering, University of Chinese Academy of Sciences, Beijing 100049 (P.R. China)

\* To whom correspondence should be addressed. Email: chenbf@iccas.ac.cn; hanbx@iccas.ac.cn.

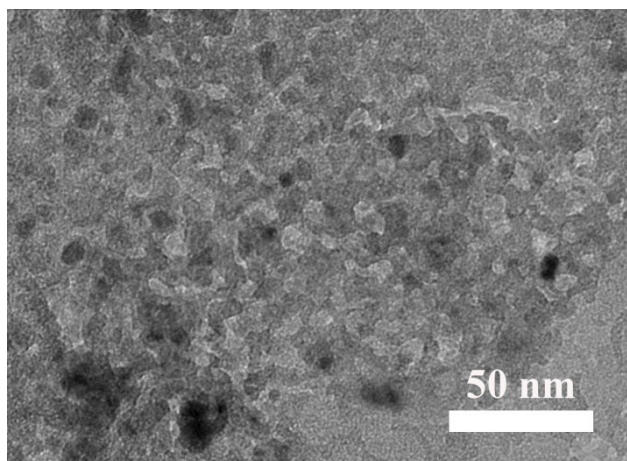

Fig. S1 TEM image of Cu-Ni/Al<sub>2</sub>O<sub>3</sub>.

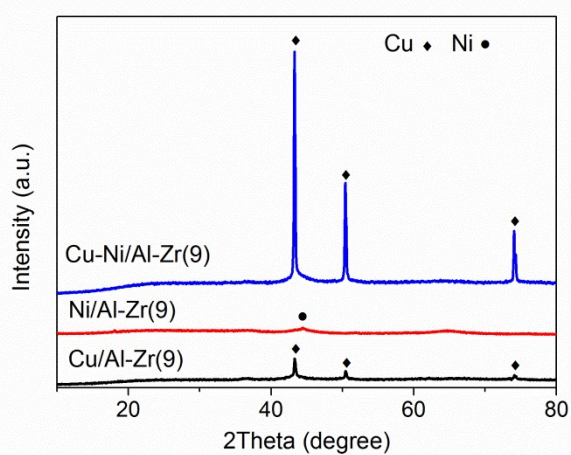

Fig. S2 XRD patterns of the as-prepared monometallic and bimetallic catalysts.

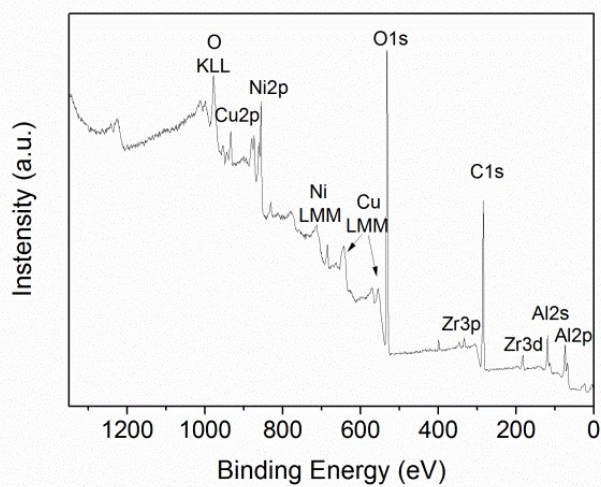

Fig. S3 XPS survey spectrum of the as-prepared Cu-Ni/Al-Zr(9) catalyst.

**Table S1** The catalytic performances of Cu-Ni supporting on the as-prepared different carriers<sup>a</sup>:

| Entry | Catalyst                             | Zr:Al<br>(mole ratio) | Con. (%) | Sel. (%) |      |        | MSR <sub>MTHF</sub> <sup>b</sup><br>(mmol <sub>MTHF</sub> g <sub>cat.</sub> <sup>-1</sup> h <sup>-1</sup> ) |
|-------|--------------------------------------|-----------------------|----------|----------|------|--------|-------------------------------------------------------------------------------------------------------------|
|       |                                      |                       |          | MTHF     | GVL  | Others |                                                                                                             |
| 1     | Cu-Ni/ZrO <sub>2</sub>               | 1:0                   | 100      | 11.9     | 88.1 | 0      | 0.512                                                                                                       |
| 2     | Cu-Ni/Al-Zr                          | 1:1                   | 100      | 42.3     | 57.7 | 0      | 1.821                                                                                                       |
| 3     | Cu-Ni/Al-Zr                          | 1:3                   | 100      | 43.7     | 56.3 | 0      | 1.882                                                                                                       |
| 4     | Cu-Ni/Al-Zr                          | 1:6                   | 100      | 65.0     | 25.8 | 9.2    | 2.799                                                                                                       |
| 5     | Cu-Ni/Al-Zr                          | 1:7                   | 100      | 66.4     | 9.4  | 24.2   | 2.859                                                                                                       |
| 6     | Cu-Ni/Al-Zr                          | 1:8                   | 100      | 94.5     | 0    | 5.5    | 4.069                                                                                                       |
| 7     | Cu-Ni/Al-Zr                          | 1:9                   | 100      | 99.8     | 0    | 0      | 4.297                                                                                                       |
| 8     | Cu-Ni/Al <sub>2</sub> O <sub>3</sub> | 0:1                   | 100      | 91.1     | 6.7  | 2.2    | 3.923                                                                                                       |

Reaction conditions: 0.1 g of LA, 0.02 g catalyst, 1.5 mL 2-butanol (solvent), 3 MPa H<sub>2</sub>, 220 °C, 10 h; b) MSR: Mass-specific rate of MTHF production (mmol<sub>MTHF</sub> g<sub>cat.</sub><sup>-1</sup> h<sup>-1</sup>) (defined as the moles of formed MTHF per gram of catalyst per hour).

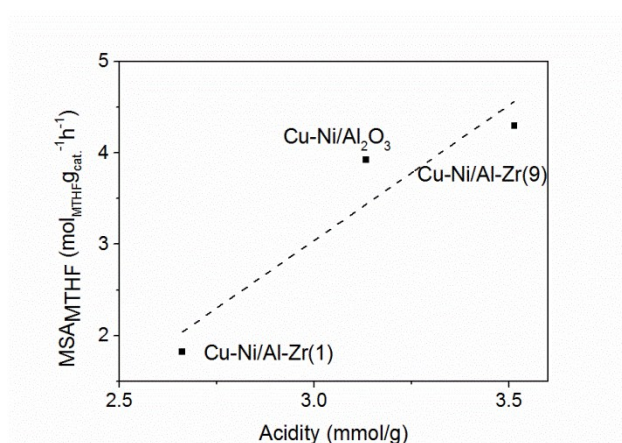**Fig. S4** Mass-specific rates of MTHF production as a function of the acid amount of the catalysts.**Table S1** The catalytic performance of Cu-Ni supporting on the commercial supports.

| Entry | Catalyst                                           | Con. (%) | Sel. (%) |      |        |
|-------|----------------------------------------------------|----------|----------|------|--------|
|       |                                                    |          | MTHF     | GVL  | Others |
| 1     | Cu-Ni/ $\alpha$ -Al <sub>2</sub> O <sub>3</sub>    | 100      | 9.7      | 90.3 | -      |
| 2     | Cu-Ni/ $\gamma$ -Al <sub>2</sub> O <sub>3</sub>    | 100      | 8.8      | 91.2 | -      |
| 3     | Cu-Ni/ Al <sub>2</sub> O <sub>3</sub><br>(neutral) | 100      | 10.1     | 85.4 | 4.5    |

a) Reaction conditions: 0.1 g of LA, 0.02 g catalyst, 1.5 mL 2-butanol (solvent), 3 MPa H<sub>2</sub>, 220 °C, 10 h; b)  $\alpha$ -Al<sub>2</sub>O<sub>3</sub>,  $\gamma$ -Al<sub>2</sub>O<sub>3</sub> and Al<sub>2</sub>O<sub>3</sub> (neutral) were obtained from the Innochem Sci. &Tech. Co. Ltd. (Beijing, China), and the contents of both Cu and Ni in the catalysts were 10 wt.%.

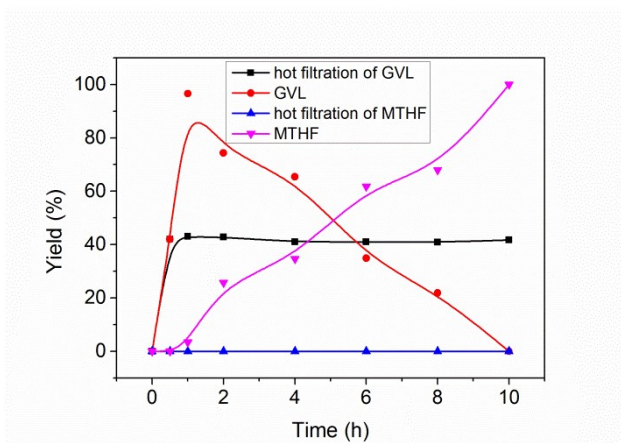

**Fig. S4** Kinetic profiles (a) and hot filtration test results for the hydrogenation of levulinic acid with Cu-Ni/Al-Zr(9) catalyst. Hot filtration test condition: 0.1 g substrate, 1.5 mL 2-butanol, 20 mg Cu-Ni/Al-Zr(9), 220 °C; catalyst filtered after 30 minutes at 220 °C.

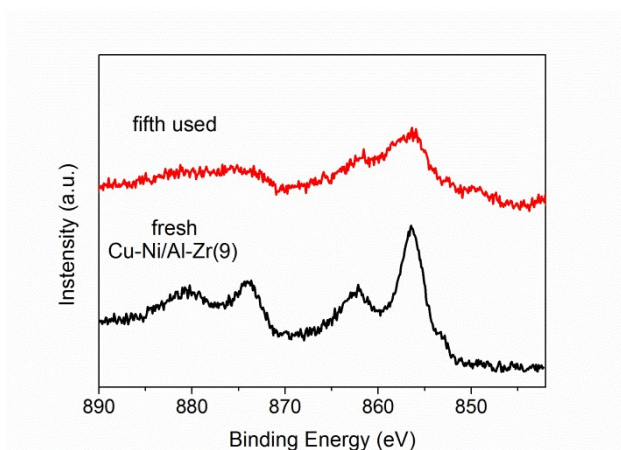

**Fig. S5** Ni XPS spectra of the fresh and reused Cu-Ni/Al-Zr(9) catalyst containing 10 wt.% Cu and 10 wt.% Ni.

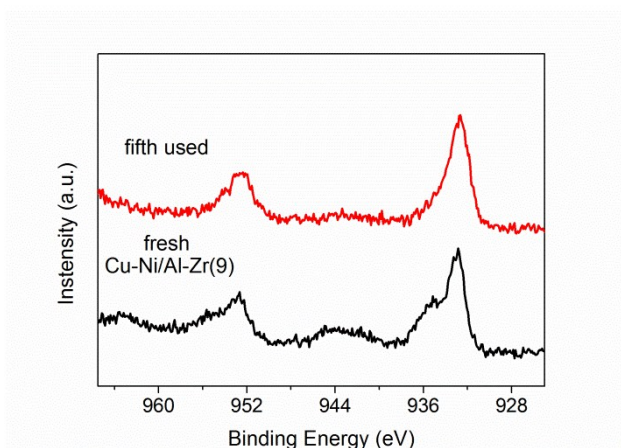

**Fig. S6** Cu XPS spectra of the fresh and reused Cu-Ni/Al-Zr(9) catalyst containing 10 wt.% Cu and 10 wt.% Ni.

**Table S2** Typically catalytic conversions of LA into MTHF.

| Ent | Catalyst                                                                                        | Additive                                                     | T (°C)                                                                                                       | H <sub>2</sub> (MPa)                | t (h)                                                                        | Con.(%) / Sel. (%) | References                                                   |
|-----|-------------------------------------------------------------------------------------------------|--------------------------------------------------------------|--------------------------------------------------------------------------------------------------------------|-------------------------------------|------------------------------------------------------------------------------|--------------------|--------------------------------------------------------------|
| 1   | Homogeneous catalyst<br>0.1 mol% [Ru(acac) <sub>3</sub> ],<br>0.2 mol% triphos                  | 1 mol% acidic ionic liquid & NH <sub>4</sub> PF <sub>6</sub> | 160                                                                                                          | 10                                  | 18                                                                           | 100/92             | W. Leitner et al, Angew. Chem. Int. Ed. 2010, 49, 5510-5514. |
| 2   | Homogeneous catalyst<br>0.5 mol% [Ru(acac) <sub>3</sub> ]<br>0.5 mol% N-triphos <sup>Ph</sup> , | 1.0 mol% HN(Tf) <sub>2</sub>                                 | 150                                                                                                          | 6.5                                 | 25                                                                           | 100/87             | A. Phanopoulos, et al, ACS Catal. 2015, 5, 2500-2512.        |
| 3   | Homogeneous catalyst<br>0.1 mol% [Ru(acac) <sub>3</sub> ]<br>0.15 mol% N-triphos                | 0.25 mol% Al(OTf) <sub>3</sub>                               | 140                                                                                                          | 5.5                                 | 30                                                                           | 100/88             | M. Beller, Angew. Chem. Int. Ed. 2015, 54, 5196-5200.        |
| 4   | Heterogeneous catalyst<br>Pd-Re/C<br>(Pd: 5 wt.%, Re: 5 wt.%)                                   | -                                                            | 200 - 250                                                                                                    | 10                                  | Continuous flow reactor                                                      | 100/ up to 90%     | D. C. Elliott, J. G. Frye, US, 5883266, 1998.                |
| 5   | Heterogeneous catalyst<br>Cu-MINT (Cu: 0.51 wt.%)                                               | -                                                            | 150                                                                                                          | 30 min microwave irradiation, 300 W | 0.5                                                                          | 90/75              | J. M. Bermudez, et al, Green Chem., 2013, 15, 2786-2792.     |
| 6   | Heterogeneous catalyst<br>Ru/C<br>(Ru: 5 wt.%)                                                  | -                                                            | two-step hydrogenation<br>1) H <sub>2</sub> 1.2 MPa, 190 °C, 45 min<br>2) H <sub>2</sub> 10 MPa, 190 °C, 4 h |                                     |                                                                              | 90/61              | M. G. Al-Shaal, et al, Green Chem., 2014, 16, 1358-1364.     |
| 7   | Heterogeneous catalyst<br>Cu/SiO <sub>2</sub> (Cu: 80 wt.%)                                     | -                                                            | 265                                                                                                          | 2.5                                 | WHSV= 0.513 h <sup>-1</sup> ; molar ratio H <sub>2</sub> /LA= 80; TOS= 100 h | 100/64             | P. P. Upare, et al, ChemSusChem, 2011, 4, 1749-1752.         |
| 8   | Heterogeneous                                                                                   | -                                                            | 250                                                                                                          | 7                                   | 5                                                                            | 100/75             | I. Obregon, et al,                                           |

|    |                                                                                                  |   |     |                                                                                                                               |    |               |                                                                    |
|----|--------------------------------------------------------------------------------------------------|---|-----|-------------------------------------------------------------------------------------------------------------------------------|----|---------------|--------------------------------------------------------------------|
|    | s catalyst<br>Cu-Ni/Al <sub>2</sub> O <sub>3</sub><br>(Cu: 12 wt.%<br>Ni: 23 wt.%)               |   |     |                                                                                                                               |    |               | ChemSusChem,<br>2015, 8, 3483-<br>3488.                            |
| 9  | Heterogeneous catalyst<br>Ni-Cu/Al <sub>2</sub> O <sub>3</sub><br>(Cu: 12 wt.%<br>Ni: 23 wt.%)   | - | 250 | 4                                                                                                                             | 20 | 100/80        | I. Obregon, et al,<br>ChemSusChem,<br>2016, 9, 2488-<br>2495       |
| 10 | Heterogeneous catalyst<br>Pt-Mo/H-β<br>(Pt: 2 mol %, Pt/Mo=15)                                   |   | 130 | 5                                                                                                                             | 24 | >99/86        | T. Mizugaki, ACS<br>Sustainable<br>Chem. Eng.,<br>2016, 4, 682-685 |
| 11 | Heterogeneous catalyst<br>Cu/Al <sub>2</sub> O <sub>3</sub> -SiO <sub>2</sub><br>(Cu: 20.3 wt.%) | - | 250 | fixed bed reactor<br>WHSV of ethyl<br>levulinate: 0.6 h <sup>-1</sup><br>molar ratio of H <sub>2</sub> to EL:<br>50 (mol/mol) |    | 99.9/65.<br>2 | J, Zheng, Sci.<br>Rep., 2016, 6,<br>28898.                         |
| 12 | Heterogeneous catalyst<br>Cu-Ni/Al-Zr(9)<br>(Cu: 10 wt.%,<br>Ni: 10 wt.%)                        | - | 220 | 3                                                                                                                             | 10 | 100/99.8      | This work                                                          |

Fig. S7 GC-MS spectra of the reaction mixture with Cu-Ni/Al-Zr(9) catalyst.

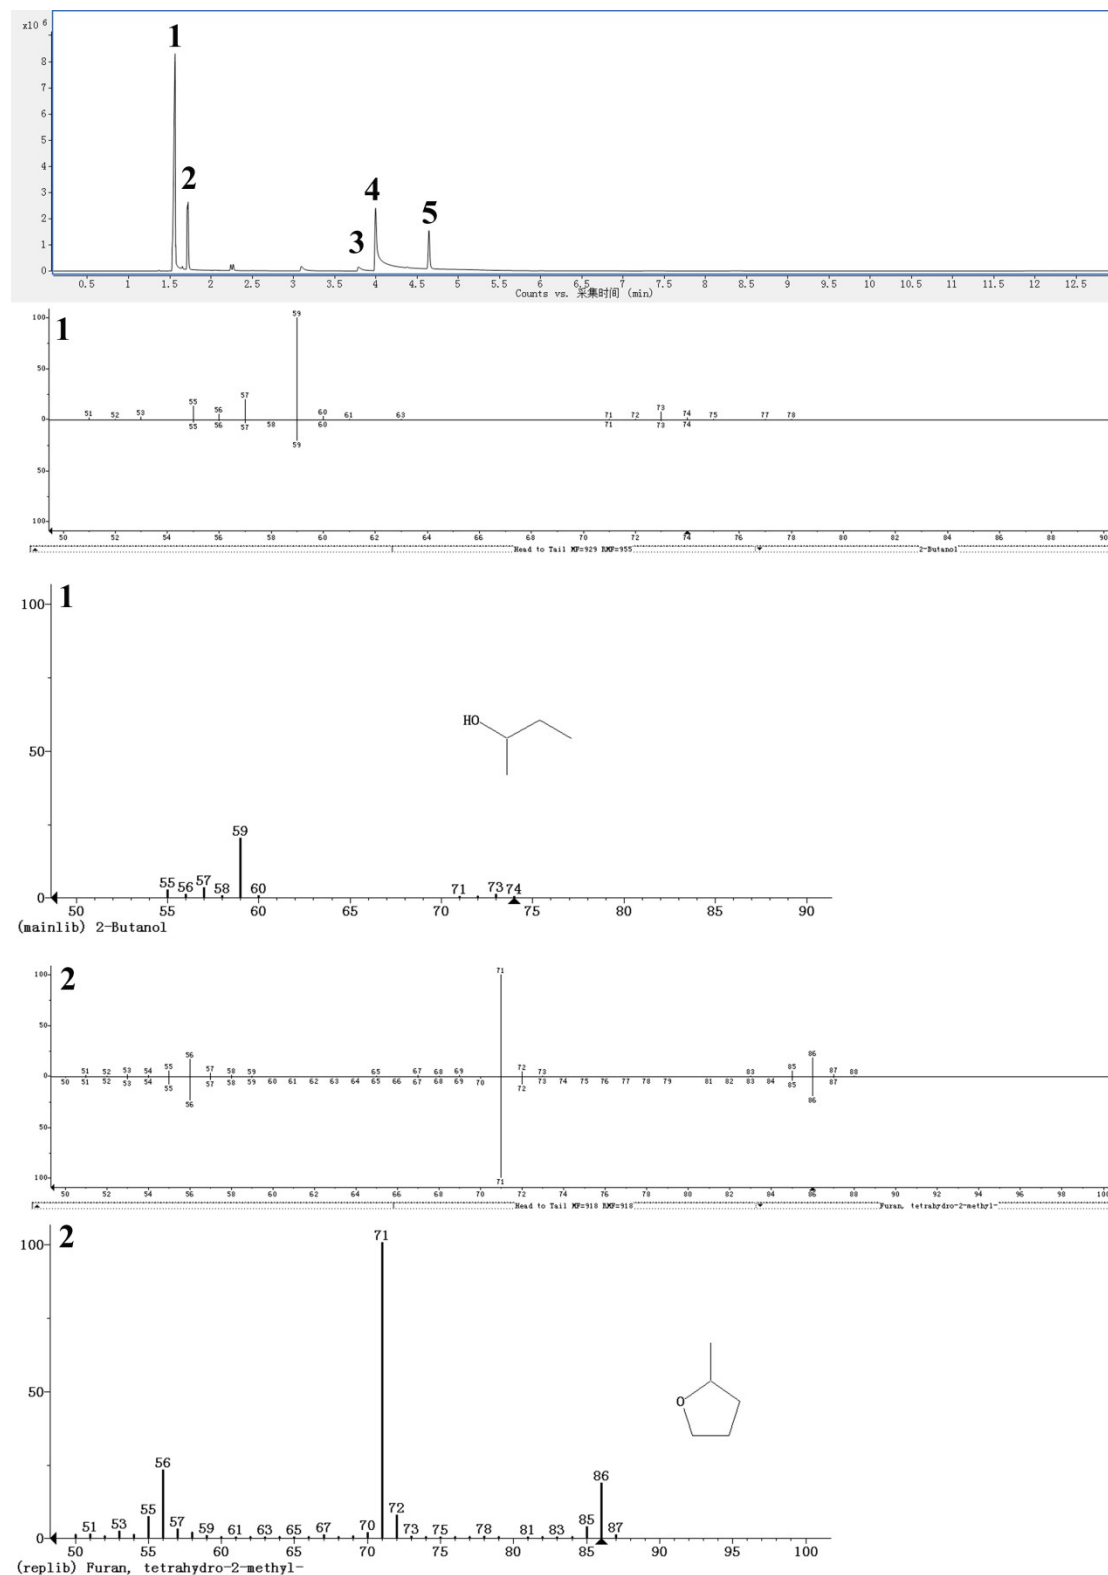

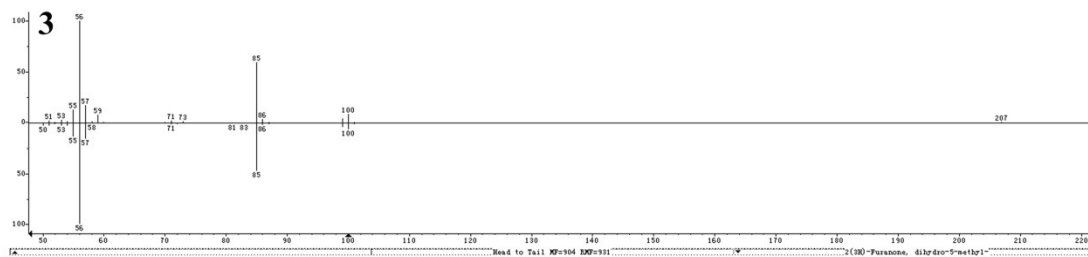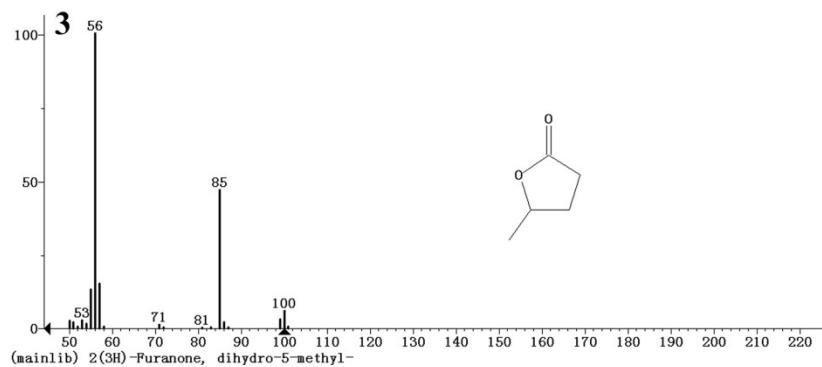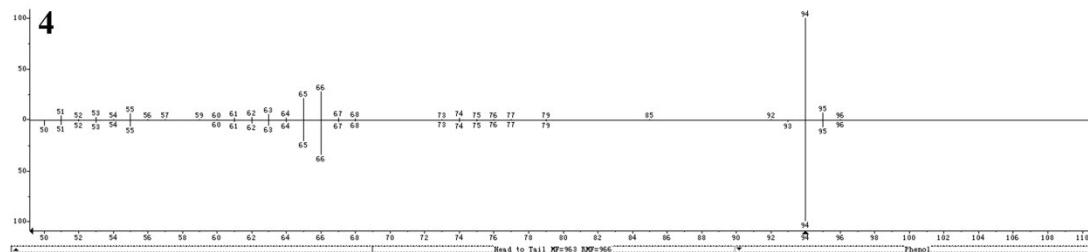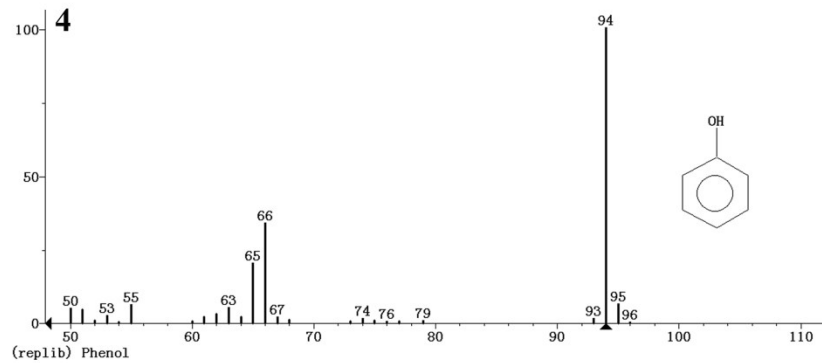



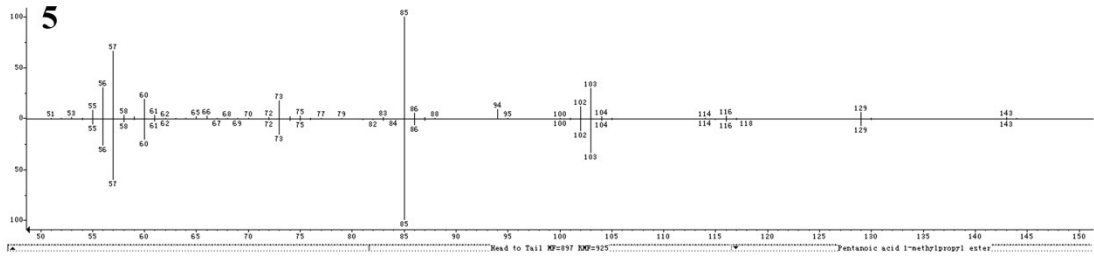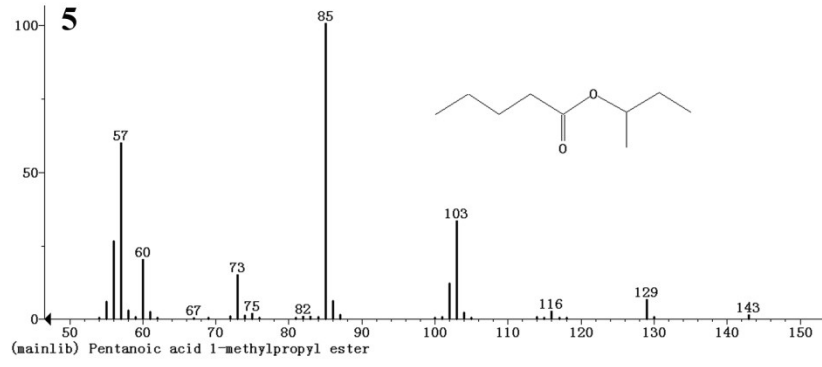

Supplement: c8gc02914h1.pdf [file c8gc02914h1.pdf]
